# Supplementary material for: Fibrillin-1gene mutations in a Chinese cohort with congenital ectopia lentis: spectrum and genotype–phenotype analysis
Source: HighWire-hosted journal article supplement (doi:10.1136/bjophthalmol-2021-319084), 2021-07-19
Supplement: bjophthalmol-2021-319084supp002_data_supplement.pdf [file bjophthalmol-2021-319084supp002_data_supplement.pdf]

**Supplementary Table S1. Panel-based NGS of 289 genes involved in common inherited anterior eye diseases.**

|          |          |          |          |         |          |          |            |
|----------|----------|----------|----------|---------|----------|----------|------------|
| AASS     | ABCA1    | ABC6     | ABHD12   | ACO2    | ADAMTS10 | ADAMTS17 | ADAMTS18   |
| ADAMTSL2 | ADAMTSL4 | AFG3L2   | AGBL1    | AGK     | AGPS     | AIRE     | ALDH1A3    |
| ANTXR1   | APOA1    | ASB10    | ASPH     | ATOH7   | ATXN1    | AUH      | B3GLCT     |
| B4GAT1   | BCOR     | BEST1    | BFSP1    | BFSP2   | BMP4     | BMP7     | BTD        |
| C12orf57 | C12orf65 | CASK     | CAV1     | CAV2    | CBS      | CDKN2B   | CDKN2B-AS1 |
| CETP     | CHD7     | CHMP4B   | CHRDL1   | CHST6   | CISD2    | CLPB     | CLU        |
| COL11A1  | COL11A2  | COL15A1  | COL17A1  | COL18A1 | COL1A2   | COL2A1   | COL4A1     |
| COL4A3   | COL4A4   | COL4A5   | COL8A2   | COL9A1  | COL9A2   | COX7B    | CPAMD8     |
| CRYAA    | CRYAB    | CRYBA1   | CRYBA2   | CRYBA4  | CRYBB1   | CRYBB2   | CRYBB3     |
| CRYGA    | CRYGB    | CRYGC    | CRYGD    | CRYGS   | CTDP1    | CYP1B1   | CYP4V2     |
| DCN      | DHCR7    | DNAJC19  | EDN3     | EDNRB   | EGR1     | ELP4     | EPG5       |
| EPHA2    | EPYC     | ERCC2    | ERCC6    | ESR1    | EYA1     | FAM126A  | FBN1       |
| FBN2     | FGFR2    | FLNA     | FOXC1    | FOXC2   | FOXD3    | FOXE3    | FOXF2      |
| FTL      | FYCO1    | GALK1    | GALNS    | GALT    | GAS7     | GBA2     | GCNT2      |
| GDF3     | GDF6     | GEMIN4   | GFER     | GJA1    | GJA3     | GJA8     | GLB1       |
| GLIS3    | GNAQ     | GNPAT    | GNPTG    | GSN     | GSTM1    | GSTT1    | GUSB       |
| HCCS     | HGSNAT   | HMGB3    | HMX1     | HSF4    | IARS2    | IDUA     | IKBK       |
| ITM2B    | JAG1     | KCNJ13   | KERA     | KRT12   | KRT3     | LAMB2    | LCAT       |
| LDLR     | LEMD2    | LGR4     | LIFR     | LIM2    | LMX1B    | LOXHD1   | LOXL1      |
| LSS      | LTBP2    | LUM      | MAB21L2  | MAF     | MCOLN1   | MFN2     | MFRP       |
| MIP      | MIR184   | MIR204   | MMP2     | MSMO1   | MYLK     | MYOC     | NAA10      |
| NDP      | NDUFB11  | NDUFS1   | NEUROG1  | NHS     | NOD2     | NOTCH2   | NR2F1      |
| NTF4     | OCRL     | OLFM2    | OPA1     | OPA3    | OPTN     | OTX2     | OVOL2      |
| P3H2     | PAX2     | PAX3     | PAX6     | PEX1    | PEX10    | PEX11B   | PEX12      |
| PEX13    | PEX14    | PEX16    | PEX19    | PEX2    | PEX26    | PEX3     | PEX5       |
| PEX6     | PEX7     | PIGN     | PIKFYVE  | PITX2   | PITX3    | PNPT1    | POLG       |
| PRDM5    | PRPS1    | PRSS56   | PTCH1    | PXDN    | RAB18    | RAB3GAP1 | RAB3GAP2   |
| RARB     | RAX      | RBP4     | RDH11    | RECQL4  | RET      | RTN4IP1  | SALL1      |
| SALL2    | SBF2     | SEMA3E   | SH3PXD2B | SHH     | SIL1     | SIPA1L3  | SIX1       |
| SIX6     | SLC16A12 | SLC25A46 | SLC33A1  | SLC38A8 | SLC39A13 | SLC4A11  | SLC4A4     |
| SMAD3    | SMAD7    | SMOC1    | SNAI2    | SORD    | SOX10    | SOX2     | SOX9       |
| SPG7     | SRD5A3   | STRA6    | STS      | SUOX    | TACSTD2  | TBC1D20  | TBK1       |

|         |          |        |        |        |        |         |        |
|---------|----------|--------|--------|--------|--------|---------|--------|
| TBX1    | TCF4     | TDRD7  | TEK    | TENM3  | TFAP2A | TGFBI   | TMCO1  |
| TMEM114 | TMEM126A | TMEM5  | TMEM70 | TMEM98 | TMX3   | TNFAIP3 | TRIM44 |
| TRPM3   | TSPAN12  | UBIAD1 | UNC45B | VAX1   | VCAN   | VIM     | VSX1   |
| VSX2    | WDR36    | WFS1   | WRN    | YAP1   | ZEB1   | ZEB2    | ZFHX4  |
| ZNF469  |          |        |        |        |        |         |        |

NGS, next-generation sequencing.
